# Supplementary material
Source: HighWire-hosted journal article supplement (https://www.eneuro.org/content/8/4/ENEURO.0059-21.2021)
Supplement: inline-supplementary-material-2 [file inline-supplementary-material-2.zip]

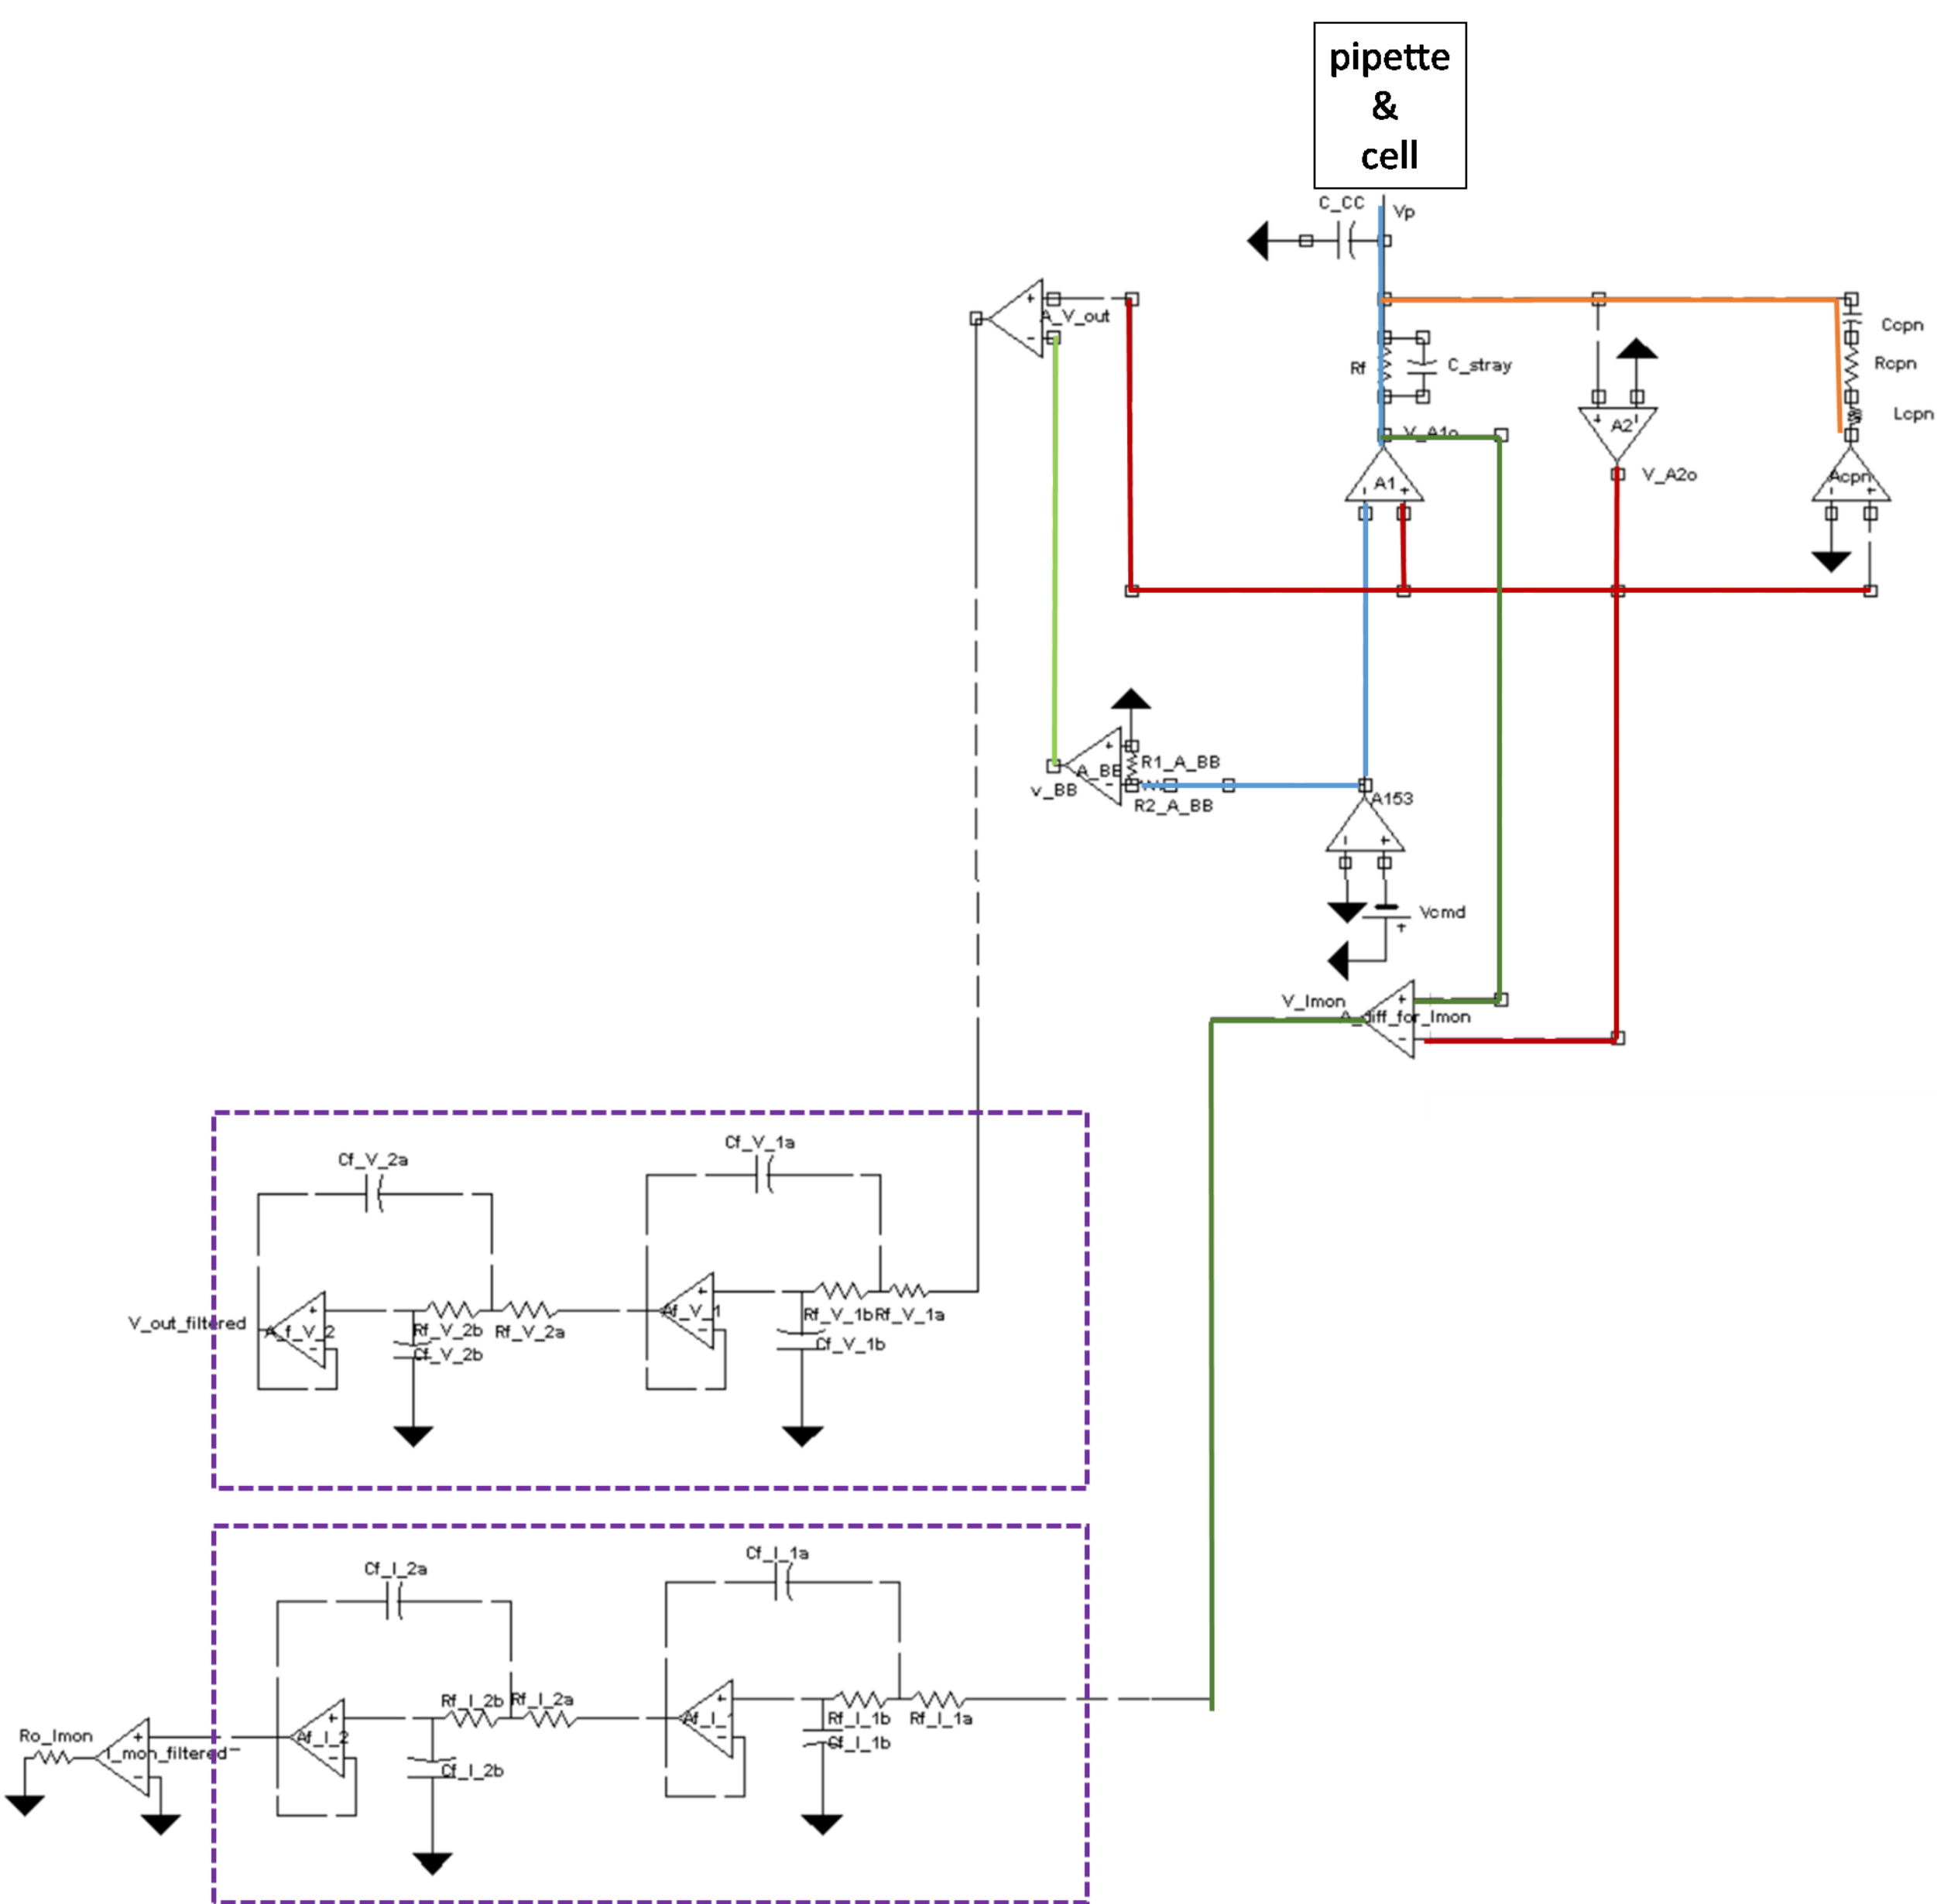

### unity gain voltage follower (A2):

the op-amp that buffers the pipette potential.  
Output signal ( — ) of A2 is fed to the capacitance neutralizing circuit, to the current generator circuit, to the current monitor circuit and to the differential amplifier, that generates bridge balance corrected output signal.

### current generator circuit: —————

As for VC, command potentials can be played by the **Vcmd** battery. To adjust the command, go to the LinearCircuit[0] → source(t)→Vcmd  
alternatively, command can be edited within the CC.ses (line 26-36) this option allows the generation of additional command steps  
The command signal is buffered by the **A153** op-amp, and injected to the pipette by the **A1** and **Rf** (Rf has stray capacitance, **Cstray**)  
Note that because of the conversion factor of 0.5 V/nA (with 500 MOhm Rf ), 1 mV command potential generates 0.5 pA current. To separate Rf from the pipette resistance output of A2 returns to the current generator path. (see Axon Guide, Chapter 3, A high-quality current source ). A153 also provide the command signal for BB compensation

### capacitance neutralization: —————

A positive feedback loop that injects the output signal of the voltage follower to the Vp, by the **Ccpn** capacitor. Level of capacitance neutralization can be set by adjusting the gain of **Acpn**. **Lcpn** and **Rcpn** are parasitic elements that makes the signal artefacts associated with the capacitance neutralization more realistic. Capacitance neutralization can be adjusted in the model by:  
set\_CPN(\$01) //the argument is the desired compensation in pF

### bridge balance compensation: —————

**A\_BB** generates a scaled version of the command signal.  
Bridge balance can be adjusted in the model by:  
set\_BB (\$01) //the argument is the desired compensation in Mohm  
**A\_V\_out** is a differential op-amp that generates the final, bridge balance corrected output voltage. Output of this path goes to a 4-pole bessell filter. The output of the filtering cascade is the monitored voltage output of the model (**V\_out\_filtered**).

### current monitor: —————

**A\_diff\_for\_Imon** re-creates the actual voltage command. Output of this path goes to a 4-pole bessell filter. Following the filtering cascade, the current passing through the **I\_mon\_filtered** op-amp is the monitored output current of the model (**I\_mon\_filtered**).

### Bessel filter: - - - - -

Current and voltage outputs have separate filter chains. Parameters of the filters were set to create 4-pole Bessel characteristics. Cutoff frequency of the filters can be adjusted with:  
set\_filter(\$01, \$02) //1st argument is the desired cutoff frequency for the V\_output in kHz , the second one is the same for the I\_output.  
(0.5, 1, 2, 3, 4, 6, 8, 10, 12, 14, 16, 18, 20, 22, 24, 26, 28, 30, 100 kHz filters are implemented).

**Ccc** sets the intrinsic capacitance of the CC circuit to its observed level.
